# Supplementary material for: Ectopic expression of human TUBB8 leads to increased aneuploidy in mouse oocytes
Source: PubMed Central journal article supplement (PMC10598138; doi:10.1038/s41421-023-00599-z), 2023-10-24
Supplement: 41421_2023_599_MOESM1_ESM.pdf [file 41421_2023_599_MOESM1_ESM.pdf]

Supplementary Materials for

**Ectopic expression of human *TUBB8* leads to increased  
aneuploidy in mouse oocytes**

Jie Dong *et al.*

\* Correspondence: Lei Wang, [wangleiwanglei@fudan.edu.cn](mailto:wangleiwanglei@fudan.edu.cn);

Tianyu Wu, [ty\\_wu@fudan.edu.cn](mailto:ty_wu@fudan.edu.cn);

Qing Sang, [sangqing@fudan.edu.cn](mailto:sangqing@fudan.edu.cn);

**This PDF file includes:**

Figures S1 to S5

Table S1

## Supplementary Figures

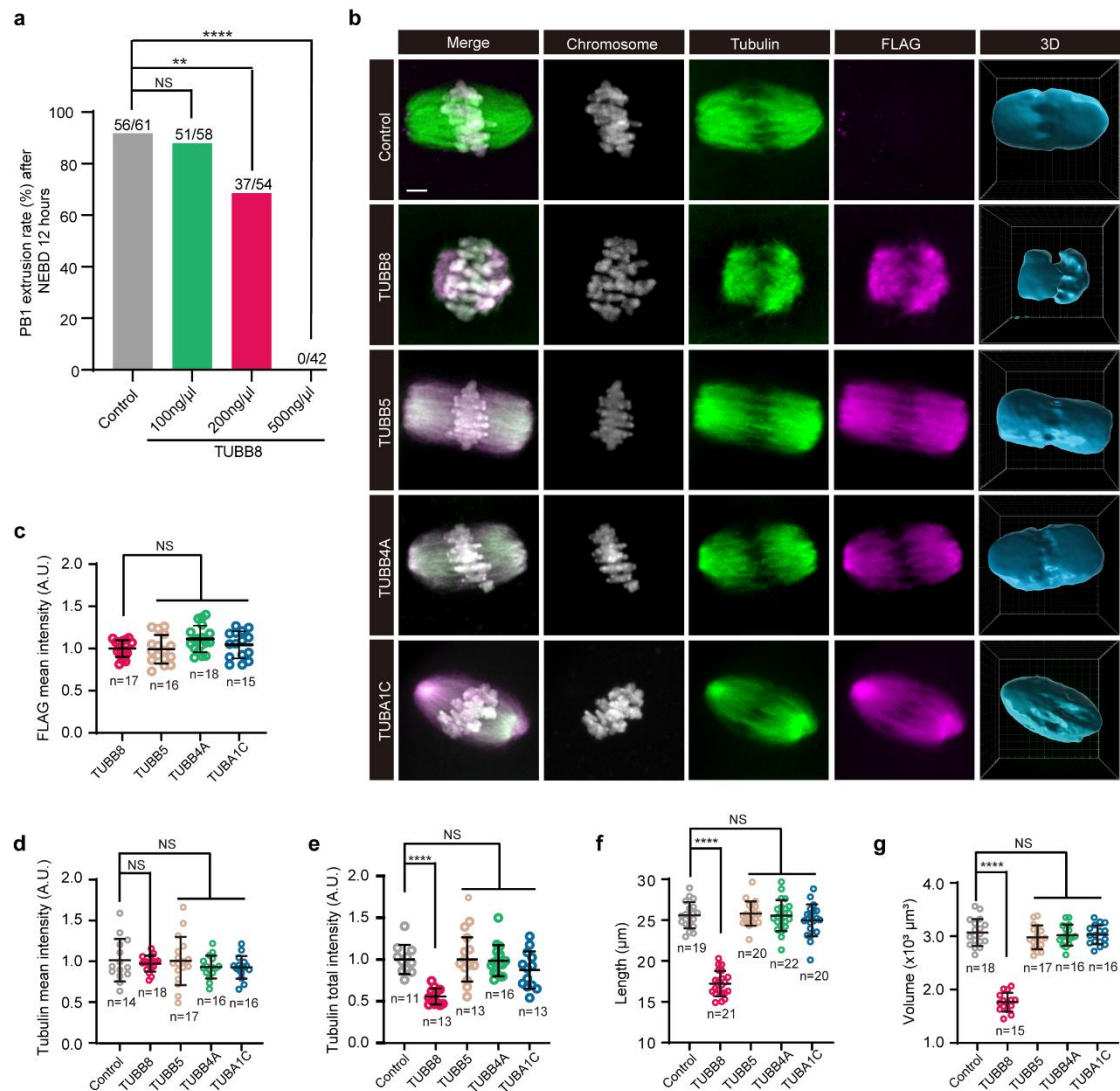

**Fig. S1 Ectopic expression of *TUBB8* led to shorter spindle lengths and smaller volumes in mouse oocytes.** **a** Statistical analysis of PB1 extrusion rates in mouse oocytes injected with varying concentrations of *TUBB8* cRNAs at 12 h after NEBD. Mouse GV oocytes were injected with 5'FLAG-*TUBB8* cRNA at varying concentrations of 100 ng/μL, 200 ng/μL and 500 ng/μL, respectively, maintained in 2.5 μM milrinone during the injection, and then washed and transferred into milrinone-free M2 medium to allow the resumption of meiosis. At 12 h after NEBD, PB1 extrusion rates in the different groups were analyzed. **b** Representative two and three-dimensional

images of spindles in MI oocytes from mouse oocytes expressing different human tubulin isotypes. Control indicates mouse GV oocytes injected with vehicle; TUBB8, TUBB5, TUBB4A and TUBA1C indicate mouse GV oocytes injected with the corresponding 5'FLAG-cRNA (200 ng/ $\mu$ L) of human tubulin isotypes, respectively. Mouse GV oocytes were injected with different cRNAs, maintained for 1 h in 2.5  $\mu$ M milrinone, and then released into milrinone-free M2 medium to allow the resumption of meiosis. At 5 h after NEBD, oocytes were fixed and immunostained for tubulin, FLAG, and DNA (using Hoechst). Scale bar, 5  $\mu$ m. **c** Statistical analysis of mean intensities of FLAG in mouse oocytes expressing different human tubulin isotypes. **d**, **e** Statistical analysis of mean intensities (**d**) and total intensities (**e**) of microtubules in mouse oocytes expressing different human tubulin isotypes. **f**, **g** Statistical analysis of spindle length (**f**), spindle volume (**g**) in mouse oocytes expressing different human tubulin isotypes. n, number of oocytes. Data in **a** were compared using Fisher's exact test. Data in **c** and **g** were tested using one-way ANOVA with multiple comparisons test. \*\* $P < 0.01$ , \*\*\*\* $P < 0.0001$ , NS, not significant. Data in **a**, **c**, **d**, **e**, **f** and **g** were collected from at least three independent experiments.

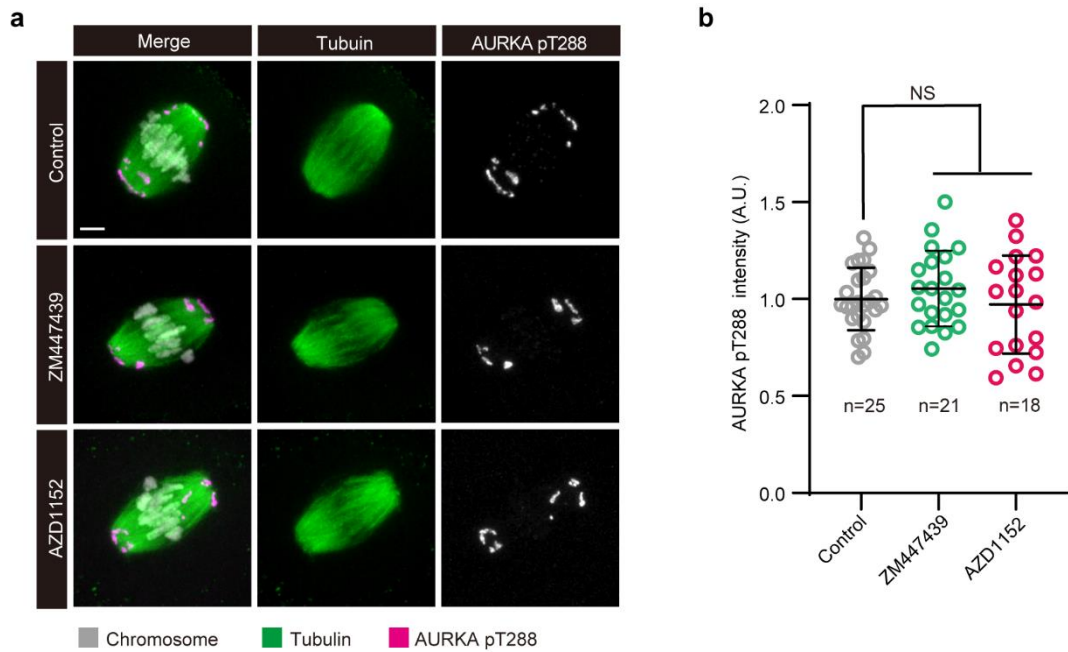

**Fig. S2 ZM447439 and AZD1152 did not inhibit the activity of AURKA in the short-term treatment.** **a** Representative images of AURKA activity as indicated by the distribution of AURKA pThr288 at late metaphase I stage. Mouse oocytes at 5 h after NEBD were treated either with ZM447439 (10  $\mu$ M) or AZD1152 (500 nM) for 15 min or 30 min, and then fixed and immunostained for AURKA pThr288, tubulin, and DNA (using Hoechst). Scale bar, 5  $\mu$ m. **b** Statistical analysis of AURKA pThr288 signal intensities relative to tubulin. n, number of oocytes. Differences between each group were tested using one-way ANOVA with multiple comparisons test. NS, not significant.

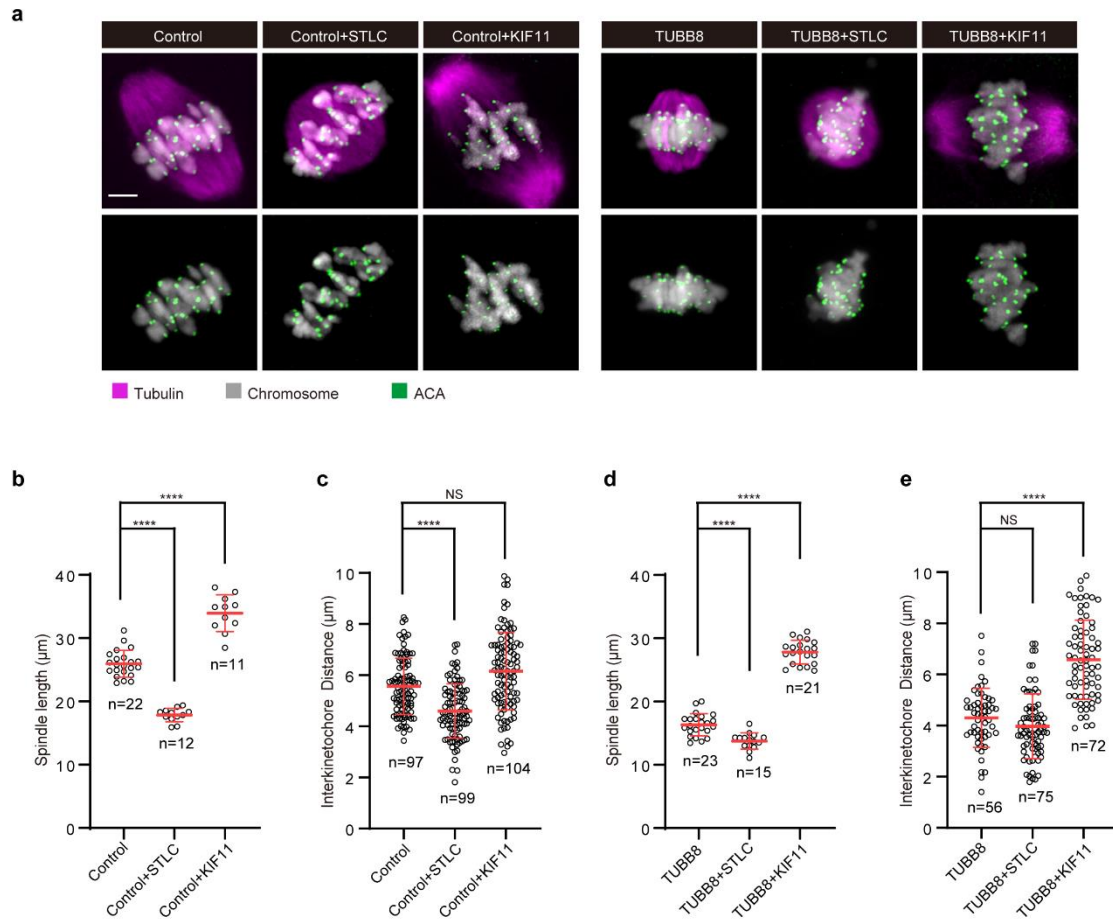

**Fig. S3 Ectopic expression of *KIF11* could partly rescue the phenotypes caused by *TUBB8* ectopic expression.** **a** Representative images of MI spindles in control oocytes (left) and oocytes expressing *TUBB8* (right) after expressing *KIF11* or being treated with STLC (0.75  $\mu\text{M}$ ). Mouse GV oocytes were injected with vehicle, 5'FLAG-*KIF11*-cRNA (500 ng/ $\mu\text{L}$ ), 5'FLAG-*TUBB8*-cRNA (200 ng/ $\mu\text{L}$ ), or a combination of 5'FLAG-*KIF11*-cRNA (1000 ng/ $\mu\text{L}$ ) and *TUBB8*-cRNA (400 ng/ $\mu\text{L}$ ), maintained for 2 h in 2.5  $\mu\text{M}$  milrinone, and then washed and transferred into milrinone-free M2 medium to allow for the resumption of meiosis. At 5 h after NEBD, oocytes were fixed and immunostained for tubulin, ACA and DNA (using Hoechst). Scale bar, 5  $\mu\text{m}$ . **b, c** Statistical analysis of the MI spindle length (**b**) and the interkinetochore distance (**c**) in controls, oocytes expressing *KIF11*, and oocytes treated with STLC. n, number of

oocytes. **d, e** Statistical analysis of the MI spindle length (**d**) and the interkinetochore distance (**e**) in mouse oocytes expressing *TUBB8*, co-expressing *TUBB8* and *KIF11*, and expressing *TUBB8* along with STLC treatment. n, number of bivalents. Data in **b, c, d** and **e** were compared using one-way ANOVA with multiple comparisons test. \*\*\*\* $P < 0.001$ . Data in **b, c, d** and **e** were collected from at least three independent experiments.

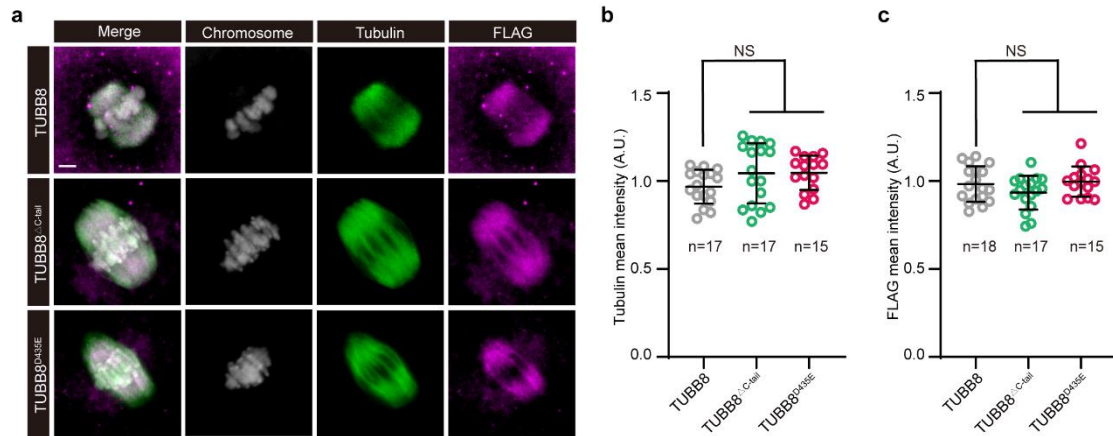

**Fig. S4** *TUBB8* without the C-terminal tail and D435E variant were all incorporated into spindles equally as well as full-length *TUBB8*. **a** Representative images of spindles in MI oocytes from mouse oocytes expressing human full length *TUBB8* (*TUBB8*), *TUBB8* without C-terminal tail (*TUBB8* $\Delta$ C-tail) and D435E variant (*TUBB8*<sup>D435E</sup>). Mouse GV oocytes were injected with 5'FLAG-*TUBB8* cRNA, 5'FLAG-*TUBB8* $\Delta$ C-tail cRNA, or 5'FLAG-*TUBB8*<sup>D435E</sup> cRNA (200 ng/ $\mu$ L), maintained for 1 h in 2.5  $\mu$ M milrinone, and then washed and transferred into milrinone-free M2 medium to allow the resumption of meiosis. At 5 h after NEBD, oocytes were fixed and immunostained for tubulin, FLAG, and DNA (using Hoechst). Scale bar, 5  $\mu$ m. **b, c** Statistical analysis of mean intensities of microtubules (**b**) and FLAG (**c**) in mouse oocytes expressing human full length *TUBB8*, *TUBB8* without C-terminal tail and D435E variant. n, number of oocytes. Differences between each group were tested using one-way ANOVA with multiple comparisons test. NS, not significant. Data in **b** and **c** were collected from at least three independent experiments.

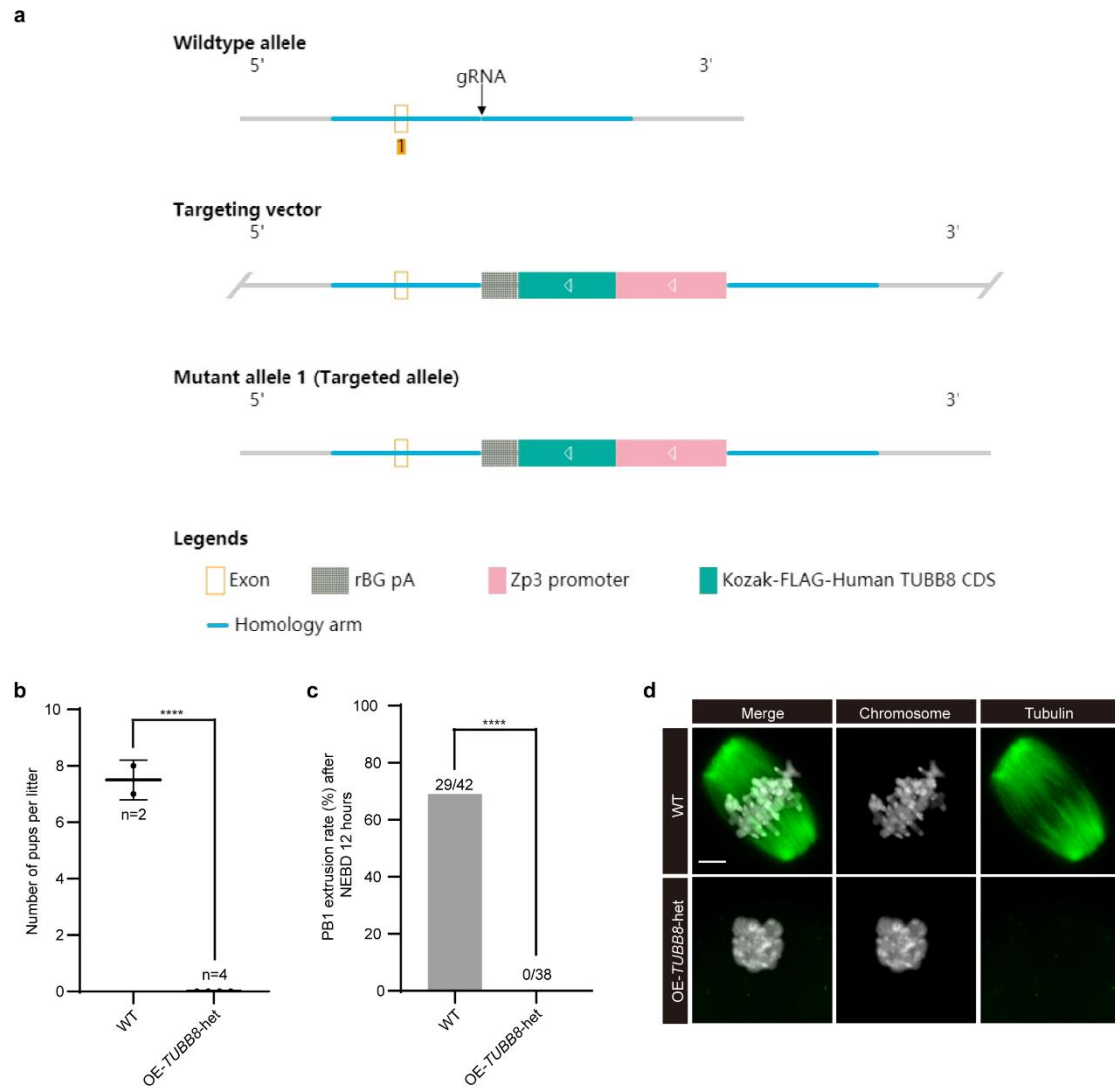

**Fig. S5 Spindles can't assemble in mouse model with oocyte-specific ectopic expression of 5'FLAG-Human-TUBB8.** **a** Schematic diagram of the in vivo mice model with oocyte-specific ectopic expression of 5'FLAG-Human-TUBB8 using a *Rosa26*-targeted *ZP3* promoter-driven KI system. **b** Reproductive ability of wildtype and heterozygous female mice expressing *TUBB8* (OE-*TUBB8*-het). Data were analyzed by Student's t-test, n, number of mice, \*\*\*\* $P < 0.0001$ . **c** Statistical analysis of PB1 extrusion rates in oocytes from wildtype and OE-*TUBB8*-het mice after NEBD 12 h. GV oocytes were isolated from the ovaries and transferred into M2 medium to allow the resumption of meiosis. At 12 h after NEBD, PB1 extrusion rates of different



groups were analyzed. Data were compared using Fisher's exact test, \*\*\*\* $P < 0.0001$ .

**d** Representative images of MI spindles in wildtype and OE-*TUBB8*-het mice. GV oocytes were isolated from the ovaries and transferred into M2 medium to allow the resumption of meiosis. At 5 h after NEBD, oocytes were fixed and immunostained for tubulin and DNA (using Hoechst), Scale bar, 5  $\mu\text{m}$ .

## Supplementary Tables

**Table S1 Primers used to amplify human genomic DNA of *TUBB8***

| Mutation in cDNA           | Primer name           | Primer (5' to 3')        |
|----------------------------|-----------------------|--------------------------|
| c.1305T>G                  | <i>TUBB8</i> -Exon4-F | AGGTGAGGAGTTACTGATGTAAAC |
| c.1304_1305insGGA          |                       |                          |
| c.1311_1312insGAGGATGAGGAG | <i>TUBB8</i> -Exon4-R | GGAGAACAACGTCCGTGCAT     |
